# Supplementary material for: Downregulation of barley ferulate 5-hydroxylase dramatically alters straw lignin structure without impact on mechanical properties
Source: Front Plant Sci. 2023 Jan 16;13:1125003. doi: 10.3389/fpls.2022.1125003 (PMC9886061; doi:10.3389/fpls.2022.1125003)
Supplement: Supplementary file 2 [file Table_1.xlsx]

## Sheet: S1_F5H genes ID
Gene ID	Name on Phyogeny tree/Sequence
>XP_002988182	>SmF5H
	MNLSSIMGEYTQHDNFTAVASLSLVLAAAIALLAALYSRLRNSKRPPLPPSPPSKLITGHLHLLDQLPNQSLYKLAKIYGPLIQLRLGVVPVVVASTAEMAREFLKVNDSVCASRPRMAAQKIITYNFTDIGWAAYGAHWRQLRKICTLELFTHRRMQETAKVRARELADTMAGIYRDRETSINMNTRIFSLTMNVINQMVMRKKPFSGSDTTEAREFIDLINGVFMVWGAFNIGDYIPGLSIFDFQGYIGMAKVLHKKLDHLLDKVIEEHIQRRMAKSDEPPDFVDVLLALTLEDGSKVSHKTIKGIIVDMIAGGTDTAAVTIEWALSELMRKPHILKKAQEEMDRVVGRDRVVDESDLPNLPYLECIVKEALRLHPSVPILRHESIEDCVVAGYRIP…
>At4g36220	>AtFAH1
	MESSISQTLSKLSDPTTSLVIVVSLFIFISFITRRRRPPYPPGPRGWPIIGNMLMMDQLTHRGLANLAKKYGGLCHLRMGFLHMYAVSSPEVARQVLQVQDSVFSNRPATIAISYLTYDRADMAFAHYGPFWRQMRKVCVMKVFSRKRAESWASVRDEVDKMVRSVSCNVGKPINVGEQIFALTRNITYRAAFGSACEKGQDEFIRILQEFSKLFGAFNVADFIPYFGWIDPQGINKRLVKARNDLDGFIDDIIDEHMKKKENQNAVDDGDVVDTDMVDDLLAFYSEEAKLVSETADLQNSIKLTRDNIKAIIMDVMFGGTETVASAIEWALTELLRSPEDLKRVQQELAEVVGLDRRVEESDIEKLTYLKCTLKETLRMHPPIPLLLHETAEDTSIDG…
>HORVU1Hr1G047220	>HvF5H1
	MVGLGKSAMEWLQDPLSWLFVASVAFVVFQRRRRGKAPPFPPGPNPLPIVGNMSMMDQLTHRGLAALAKQYGGLLYLRLGKLHAFAVSTPEYAREVLQAQDGAFSNRPATIAIAYLTYDRADMAFAHYGPFWRQMRKLCVMKLFSRRRPETWIAVRDESAALVRAVARRSGESVNLGELIFNLTKNVIFRAAFGAGAAADGDGGKQDEFIAILQEFSKLFGAFNIGDFFPWLSWADPQGINVRLRAARAALDEFIDKIIDEHMARGKNPDDVDADMVDDMLAFLPEAKPKKAAGDGGDELQNTLRLTRDNIKAIIMDVMFGGTETVASAIEWAMAEMMHSPDDLRRLQKELVDTVGLDRNVNESDLDKLPFLKCVIKETLRLHPPIPLLLHETAEDCVV…
>HORVU3Hr1G014930	>HvF5H2
	MEMDWLQDPLSWLFVASVVFVVLRLRRRDRAPPLPPGPNPLPIVGNMSMMDQLTHRGLAALAKKYGGFLHLRLGKAHVFAVSTPEYAREVLHVQDGAFLNRPASIAATYLTYDRADMAFAHYGPFWRQMRKLCVMKLFSRRRPDTWLAVRDESAALVRAVARRSGETVNLGELIFNLAKNVTFRAAFGAGDGGKQEEFVAILQEFSKLFAAFCIGDFIPWLSWADPQGINVRLRTARAALDQFIDKIIDEHMMRGRNPDDADADMVDGMLAFLPEARPNKTAGDGREDLQNTLRLTRDNIKAMIMDVMFGGTETVASAIEWAMAEMMHYPDDLRRLQQELADTVGLDRNVNESDLDKLPFLKCVIKETLRLHPPIPMLNHENAEDCVVDGYSVPRGSRV…
>HORVU2Hr1G109440	>HvF5H3
	MVGLATIAMEWLQEPVTWFFIASVVLVVLQRLRRRRGKAPPLPPGPYPLPIVGNMFTMDQDQLTHRGLAALAKQYGSIFHIRLGKVHAIVLSTPEYAQEVLQAQDVAFSNRPATIAAIYLTYDRADMAFAHYGPFWRQMRKLCVMKLFSRRRAGTWLAVRDESAALVRAVARQTGESVNLGELIFNLTKNVTFRAAFGAAGDAGKRDEFIAIMQEFSHLFAAFSLGDFIPWLSWADQGTNVRARAARAALDEFIDFIIDEHVERGKNPDDVDADMVDDMLAFLSEAKPKEADGDDLQNTLRLTRDNIKAMIMDVMFGGTETVASGIEWAMAEMMQSPNELRRLQEELADVVGLDRNVDESDLDKLPFLKCVIKETLRLHPPIPILHHENAKDCVVGGYS…
>HORVU7Hr1G084500	>HvF5H4
	MAAFAKIAMECLQDPLIWLFLASVALVILQRRRLNRPPLPPGPKPLPIIGNMMMADQLTHRGLAALAKQYGGLLHLRLGSLRIFAVSTPEYAREVLQAQDSDFWYRPASIAIRYLTYGCSDMAFAHDGPYWRQMRKLCVTKLFSRRRDETWLAVRDGYGELARAVGRSSGEAVNLGELIFKHTVSIIFRAAFGVRDVEGLDEFIPMFKEFSNLLEAFHLGDFFPWLSWIGRRGFDGRLRTVRGALGTFVDKIIDEHVRRGKNPEDADADMVDGLLAFLADANGKDDFRGYTRDNVRAMMMDMLFGGPDTVGFTIEWAMAEMMHCPSILQRVQHELIDIVGLDRIVDESDLDKLPFLKCVVKETLRMHPPIPIHLHGTTKDCILGAYSVPRGSRVFINAW…
>HORVU2Hr1G092360	>HvF5H5
	METWWPQCGLHLALLLTGVILYRAISSWRYGHRPLPLPPGPRALPFLGNIFYTRDMTHRGLARLSARYGGLLHLRVGHLSTVVVSTPEIARLVLQVNDRAFANRPASGPIAYLTYGRADMVFAQYGPFWREMRKLCVHRLFSHRRAASWAAVHDEVDNLIRDVARYTGSVVNLGELVFNMSMNITLRAALGMRNEGADAAEFVAIVQEFAQLFAVSNSTLADYVPWVARLDLQGIDRRMVAARAALDRFIDRAIDEHLAHPKPVDATDADMVDGMLAFLVENPRSGDTMSTDSSADGSTLRLTRDNIKATIMDVMIGGTGPVAMIIEWLMSELLRNPEEMKRVQNELAVVVGLHRQVAADDLGELPYLRCAVKETLRVHPPGPLLQHEAAEDCIVAGCR…
> TraesCS1A02G177800	>TaF5H1-A
	MAGLAKTGMEWLQDPLSWLFVASVVFVVLQRRRRGKAPPFPPGPNQLPIVGNMSMMDQLTHRGLAALAKQYGGLLHLRLGKLHAFAVSTPEYAREVLQAQDGAFSNRPATIAIAYLTYDRADMAFAHYGPFWRQMRKLCVMKLFSRRRPETWVAVRDESAALVRAVARRSGESVNLGELIFNLTKNVIFRAAFGAGAAADGDGGKQDEFIAILQEFSKLFGAFNIGDFFPWLSWADPQGINVRLRAARAALDEFIDKIIDEHMARGKSPDDVDADMVDDMLAFLPEAKPKKAAGDGGDELQSTLRLTRDNIKAIIMDVMFGGTETVASAIEWAMAEMMHSPDDLRRLQKELADTVGFDRNVDESDLDKLPFLKCVIKETLRLHPPIPLLLHETAEDCVV…
> TraesCS1B02G202400	>TaF5H1-B
	MVDLAKTAMEWLQDPLSWLFVASVVFVVLQRRRRGKAPPFPPGPNQLPVVGNMSMMDQLTHRGLAALAKQYGGLLHLRLGKLHAFAVSTPEYAREVLQAQDGAFSNRPATIAIAYLTYDRADMAFAHYGPFWRQMRKLCVMKLFSRRRPETWVAVRDESAALVRAVARRSGESVNLGELIFNLTKNVIFRAAFGAGAAADGDGGKQDEFIAILQEFSKLFGAFNIGDFFPWLSWADPQGINVRLRAARAALDEFIDKIIDEHMARGKSPDDVDADMVDDMLAFLPEAKPKKAAGDGGDELQNTLRLTRDNIKAIIMDVMFGGTETVASAIEWAMAEMMHSPDDLRRLQKELADTVGLDRNVDESDLDKLPFLKCVIKETLRLHPPIPLLLHETAEDCVV…
> TraesCS1D02G176400	>TaF5H1-C
	MAGLAKTAMEWLQDPLSWLFVASVVFVVLQRRQRGKAPPFPPGPNQLPIVGNMSMMDQLTHRGLAALAKQYGGLLHLRLGKLHAFAVSTPEYAREVLQAQDGAFSNRPATIAIAYLTYDRADMAFAHYGPFWRQMRKLCVMKLFSRRRPETWVAVRDESAALVRAVARRSGESVNLGELIFNLTKNVIFRAAFGAGAAADGDGGKQDEFIAILQEFSKLFGAFNIGDFFPWLSWADPQGINVRLRAARAALDEFIDKIIDEHMTRGKSPDDVDADMVDDMLAFLPEAKPKKAAGDGGDELQNTLRLTRDNIKAIIMDVMFGGTETVASAIEWAMAEMMHSPDDLRRLQKELADTVGLDRNVDESDLDKLPFLKCVIKETLRLHPPIPLLLHETAEDCVV…
> TraesCS2B02G518400	>TaF5H3-B
	MVGLAKIAMDWLQEPLSWLFVASFVFVVLQRHRQRLRGKAPPLPPGPSPLPIVGNMFMMDQLTHRGLAALARQYGGILHLRLGQVHAVVLSTPEYAQEVLQAQDVAFSNRPATVAAIYLTYDRADMAFAHYGPFWRQMRKLCVMKLFSRRRAGTWLAVRDESAALVRAVARRSGESVNLGELIFNLTKNVTFRAAFGADAAGDAGKRDEFIAIMQEFSQLFGGSSIGDFIPWLGWVDQGLNVRARTARAALDEFIDKIIDEHMRRGKNPDDVDADMVDDMLAFLPEAKPKKDAGDDLQNSLHLTRDNIKAMIMDVMFGGTETVASGIEWAMTEMMHSPDDLRRLQQELADVVGLDRNVDESDLDKLPFLKCVIKETLRLHPPIPILHHENAEDCVVGGY…
> TraesCS2A02G490100	>TaF5H3-A
	MVGLAKIAMGWLKEPLSWLFIASVVFVVLQRQRRRGKAKAPPLPPGPYPLPIVGNMFIMDQLTHRGLAALAKRYGGILHLRLGQVHAVVLSTPEYAREVLQAQDVAFSNRPATVAAIYLTYDRADMAFAHYGPFWRQMRKLCVMKLFSRRRAGTWLAVRDESAALVRAVARRSGECVNLGELIFNLTKNVTFRAAFGADAAGDAVKRDEFIAIMQEFSQLFGGSSIGDFIPWLGWADQGLNVRARAARAALDEFIDRIIDEHMRRGKNPDDVDADMVDDMLAFLPEAKPKKTAGDDLQNSLRLTRENIKAMIMDVMFGGTETVASGIEWAMTEMMHSPDDICRLQQELADVVGLDRNVDESDLDKLPFLKCVIKETLRLHPPIPILHHENVEDCVVGGY…
> TraesCS2D02G490500	>TaF5H3-D
	MVGLAKIAMEWLQEPLSWLFVASFIFAVLQRQRRRGKAKAPPLPPGPYPLPIVGNMFMMDQLTHRGLAALAKQYGGILNLRLGQVHAVVLSTPEYAREVLQAQDVAFSNRPATVAAIYLTYDRADMAFANYGPFWRQMRKLCVMKLFSRRRAGTWLAVRDESAALVRAVARRSGECVNLGELIFNLTKNVTFRAAFGADAAGDAGKRDEFIAIMQEFSQLFGGSSIGDFIPWLGWADQGLNVRARAARAALDEFIDKIIDEHMKRGKNPDDVDADMVDDMLAFLPEAKPKKAAGDDLQNSLRLTRENIKAMIMDVMFGGTETVASGIEWAMTEMMHSPDDLRRLQQELTDMVGLDRNVDESDLDKLPFLKCVIKETLRLHPPIPILHHENAEDCVISGY…
> TraesCS3D02G082600	>TaF5H2-D
	MVGLSLTKIAMEWLQDPLSWLFVASVVFVVLKRRRRRGRAPPLPPGPNPLPIVGNMSMMDQLTHRGLTALAKKYGGFLHLRLGKVHAFAVSTPEYAQEVLQVQDAAFSNRPATLAATYLTYDRADMAFAHHGPFWRQMRKLCVMKLFSRRRPETWLAVRDESAALVRAVARRSGETVNLGELIFNLAKNVTFRAAFGAGAAGDAGKQEEFIAILQEFSKLFVEFCIGDFIPWLSWADPHGMNVRLRAARAALDQFIDKIIDEHMKRGRNPDDVDADMVDDMLAFLPEARTKEAAGDGEDDLQNTLRLTRDNIKAMIMDVMFGGTETVASAIEWAMAEMMHCPDDLRRLQQELTDTVGLDRNVDESDLDKLPFLKCVIKETLRLHPPIPLLNHENAEDCV…
> TraesCS3B02G098600	>TaF5H2-B
	MVGLTKIAMEWLQDPLSWLFVASVVFVMLQRRRRRGRAPPLPPGPNPLPIVGNMSMMDQLTHRGLTALAKKYGGFLHLRLGKVHAFAVSTPEYAQEVLQVQDAAFSNRPASLAATYLTYDRADMAFAHHGPFWRQMRKLCVMKLFSRRRPETWLAVRNESAALVRAVARRSGETVNLGELIFNLAKNVTFRAAFGAGAAGDAGKQEEFIAILQEFSKLFVEFCIGDFIPWLSWADPQGINVRLRAARAALDQFIDKIIDEHMKRGRNPDDVDADMVDDMLAFLPEARTKKAAGDRGDDLQNTLRLTRDNIKAMIMDVMFGGTETVASAIEWAMSEMMHCPDDLRRLQQELADTVGLDQNVDESDLDKLPFLKCVIKETLRLHPPIPLLNHENAEDCVVG…
>AC210173.4_FGT005	>ZmF5H1
	MVTVAKIAMEWLQDPLSWVFLGTLALVVLQLRRRGKAPLPPGPKPLPIVGNMAMMDQLTHRGLAALAERYGGLLHLRLGRLHAFAVSTPEYAREVLQAQDGAFSNRPATIAIAYLTYDRADMAFAHYGPFWRQMRKLCVMKLFSRRRAETWVAVRDECAALVRAVASGGGGGGEAVNLGELIFNLTKNVTFRAAFGTRDGEDQEEFIAILQEFSKLFGAFNVVDFLPWLSWMDLQGINRRLRAARSALDRFIDKIIDEHVRRGKNPDDADADMVDDMLAFFAEAKPPKKGPAAAADGDDLHNTLRLTRDNIKAIIMDVMFGGTETVASAIEWAMAEMMHSPDDLRRLQQELADVVGLDRNVNESDLDKLPFLKCVIKETLRLHPPIPLLLHETAGDCVV…
>GRMZM2G100158_T01	>ZmF5H2
	MAAAVANIGMEWLQDPLSWVFLGTVCLVVLQQLRRRRGKAPLPPGPKPLPIVGNMGMMDQLTHRGLAALAETYGGLLHLRLGRLHAFAVSTPEYAREVLQAQDGAFSNRPATAAIAYLTYDRADMAFAHYGPFWRQMRKLCVMKLFSRRRAETWAAVRDECAALVRAVAVGGGSGGEAVNLGELIFSLTKNVTFRAAFGTRDGEGQEEFIAILQEFSKLFGAFNVGDFLPWLGWMDLQGINRRLRAARSALDRFIDKIIDEHVRRGKSPDDADADMVDDMLAFFVEATPGKATGAAAAADGGDDLHNTLRLTRDNIKAIIMDVMFGGTETVASAIEWAMAEMMHSPDDLRRVQQELADVVGLDRNVSESDLDRLPFLRCVIKETLRLHPPIPLLLHETA…
Sugarcane (AOR81843.1)	>SaH_AOR81843
	MAAVAKIAMEWLQDPLSCVFLVTLAVVLLQLRRRGKAPLPPGPKPLPIVGNMALMDQLTHRGLAALAEKYGGLLHLRLGRLHAFAVSTPEYAREVLQTQDGVFSNRPATIAIAYLTYDRADMAFAHYGPFWRQMRKLCVMKLFSRRRAETWVAVRDECAALVRGVAVSSGGGEKAVNLGELIFNLTKNVTFRAAFGTRDGEDQEEFIAILQEFSKLFGAFNIGDFLPWLGWMDLQGINRRLRAARSALDRFIDKIIDEHVKRGKSPDDADADMVDDMLAFFAEAKPAAAVNGGAAANGDDLQSTLRLTRDNIKAIIMDVMFGGTETVASAIEWAMAEMMHSPDDLRRVQQELADVVGLDRNVNESDLDKLPFLKCVIKETLRLHPPIPLLLHETADDCV…
>Seita.9G193900(Setaria viridis)	>SvF5H1
	MAVAVPKIAMEWLQDPLSWALLALVAFVLLQLRRRGKGPLPPGPKPLPIIGNMTMMDQLTHRGLAALAEQYGGLLHLRLGRLHAFAVSTPEYAREVLQVQDGAFSNRPATIAIAYLTYDRADMAFAHYGPFWRQMRKLCVMKLFSRRRAETWVAVRDEAAALVRAVASSGGEAVNLGELIFNLTKNVIFRAAFGTRDGGGQDEFIAILQEFSKLFGAFNIGDFIPWLSWMDPQGINRRLRAARAALDRFIDKIIDEHMKRGKSPDDADADMVDDMLAFLAEAKPANKSAAGGDVDDLQSTLRLTRDNIKAIIMDVMFGGTETVASAIEWAMAEMMHSPDDLRRLQQELADVVGYDRNVSESDLDKLPFLRCVIKETLRLHPPIPLLLHETAEDCVVGGY…
>Bradi3g30590	>BdF5H1
	MAEWLQDPLSWLFVASVLLLVLQRRRHANKAPFPPGPKPLPIIGNMTMMDQLTHRGLAALAKQYGGLLHLRLGKLHAFAVSTPEYAREVLQAQDGAFSNRPATIAIKYLTYDRADMAFAHYGPFWRQMRKLCVMKLFSRRRAETWVAVREESAALVGAVASAKTGEAVNLGELIFSLTKNVIFRAAIGSAGDGGKQDEFIAILQEFSKLFGAFNIGDFFPWLGWADTQGIDARLRAARSALDGFIDNIIDEHMERGKNPDDADADMVDDMLAFLDEAKPKKAGAGAGDDDLQNSLRLTRDNIKAIIMDVMFGGTETVASAIEWAMAEMMHSPSDLHRLQQELADVVGLDRNANESDLDKLPFLKCVIKETLRLHPPIPLLLHETAEDCVVGGYSVPRGS…
>Bradi1g77740	>BdF5H2
	MANNMMQQLFQAEYYSSSSSLLLLLWLALAAATLSVPLLRLRLTPRGPPLPPGPWPLPVIGNMLMMGRLTHRGLAALAGRHGGLFHLRLGRVHAVVVSSPAHAREVLSVQDAAFSGRPASAAVAYLTYGRADMAFAPYGRFWRQVRRLSSTRLFSSRRSQSWLAVRDESAALVRAIAESSGSGGEVVDVGELMFVLTKNVVFRAAFGAGESRGRRQEELVERLHEFSELMGVFSVGDFFPWLRWVDGLRGVNGRLRRARGGLDELVDGIIDEHVEGKKRKGDVDADMVDDMFAFLDDDDLAAAGKIKDDGDNDDDGLRLTRDNIKAIIMDFMFGGTETVAAAMEWAMAELLRSPNDLRRVQQELTETIGLDRTVEETDINTPDSLPFLRCIVKETLRLH…
>Bradi1g77597	>BdF5H3
	MEQFLQEYSSSLVLLLWLALAATLSVPLLRLLLTRRGPPLPPGPWQWPVIGNMLMMGQLTHRGLAALAGRYGGLFHLRLGRVHAVVVSSPAHAREVLGVQDAAFSNRPASAAVAFLTYGRADMAFAHYGRFWRQVRKLSSARLFSRRGSRAARSWLAVRDESAKLVRAIDAEISGSGGGEAAVDIGELLFVLTKNVVFRAAFGDRGRRQEDELGELLREFSELMGAFSVGDFIPWLRWVDGLRGVDERLRKARAGIDELLDRIIDEHLEGKKKSKDDVDADMLDDMLEFFEEDDDDPAAGKKDGGDEPHNDKGLRLTRNNIKAITMSCIQDFMFGGMETVAAAMEWAMAELLRSPDNLRRVQQELAETIGLDRTVLDSDINTVPDSLPFLRCIVKETLR…
>SbRio.01G207600	>SbF5H1
	MAMMDQLTHRGLAALADKYGGLLHLRLGRLHAFAVSTPEYAREVLQTHDGVFSNRPATIAIAYLTYDRADMAFAHYGPFWRQMRKLCVMKLFSRRRAETWVAVRDECAALVRAVATSGGEKAVNLGELIFTLTKNVTFRAAFGTRDGEDQEEFIAILQEFSKLFGAFNIGDFLPWLGWMDLQGINRRLRAARSALDRFIDKIIDEHVKRGKSPDDADADMVDDMLAFFAEAKPAAVNGGAAANGDDLQNTLRLTRDNIKAIIMDVMFGGTETVASAIEWAMAEMMHSPDDLRRVQQELADVVGLDRNVNESDLDKLPFLKCVIKETLRLHPPIPLLLHETADDCVVGGGGGRRYSVPRGSRVMINVWAIGRHRGSWKDADVFRPSRFTPGGDAAGLDFK…
>SbRio.05G091300	>SbF5H2
	MEWPNDLLSCVLLASLAVVLLQLRQRSKLPLPPGPKPLPIIGNLMMMGQLTHRGLAALAERYGGLLHLRLGRRHVFVVSTAEYAREVLQAQDVAFANRPATAAIAYLSYGHADMAFAHYGPFWRQARKLSVTKLFSRRRAETWLALRDESAALVRAVARRSGDGEVVNLGELVFTLSTNVIFRAAFGTGGCEALQGEYIGVLQEFSKNISTFSIGDFMPAWLAWIDLNRRRLRQTRDGLDRFIDKIIDDHIQRGRSSSDAQADIVDEMLACIPRDDAVDDRHGGSLRLTRRNIKAFILDIMFGGTETVASSIEWTMKELLRNADELRRLQQELADVVGMDQNVSESDLGSLPFLRCVVKETLRMHPPIPMLYHATAKDCVVGGYSVPGGSQVTVNVWAI…
>LOC_Os10g36848(CAldH1)	OsF5H1
	MADMVKFTMEWLQDPLSLAIVVTVAVLIMRMQRRRAAPFPPGPKPLPIVGNMAMMDQLTHRGLAALAKEYGGLMHLRLGRLHAFAVSTPEYAREVLQAQDGAFSNRPATTAIAYLTYDRADMAFAHYGPFWRQMRKLCVVKLFSRRRAETWLAVRDESAALVRAVAASRGEAAVNLGELIFNLTKNVIFRAAFGTRDGEGHDEFIAILQEFSKLFGAFNIGDFIPWLSWADTNGINARLVAARTALDRFIDKIIDEHMERGKNPDDADADMVDDMLAFLAEAKPHAGKAAAAAAGAGDGADDLQNTLRLTRDNIKAIIMDVMFGGTETVASAIEWAMAEMMHSPDDLRRVQEELAAVVGLGRDVAESDLDKLPFLRCVIKETLRLHPPIPILLHETAAD…
>LOC_Os03g02180(OsF5HL2)	>OsF5H2
	MANGVAEYLLMDPWLVLWLVLASMAFALLHLRRRARRGAPPLPPGPRPLPIIGNMLMMDQLTHRGLAAMAARYGGLLHLRLGRVHMVVVSSPEHAREVLQVQDGDFSNRPASIAIAYLTYGRADMAFSHYGHFWRQVRKLSAVRLFSRRRAQSWRAVRDESAKLVGAIARRAGEAVDLGELIFGLTKDVIFRAAFGTRDGGGHGELEVLLQEFSKLFGAFNVGDFIPWLAWLDPHGINRRLRAARAALDSVIDRIIDEHVSNPAGDEDADMVDDMLAFLDEAGRDQTGGGGELQGTLRLTRDNIKAIIMDFVFGGTETVASAIEWAMAELLHSPGDLRRLQAELADVVGLGRGVEEGDLEKLPFLRCVAMETLRLHPPIPLLLHEAAADCVVGGYSVPR…
> TraesCS7D02G350100	>TaF5H4-D
	MAAFAKIAMECLHDPLIWLLLASVALVILQRRRLKLNPPPLPPGPKPLPIIGNLMMADQLTHRGLAALAKQYGGLLHLRLGSLRVFAVSTPEYAREVLQAQDSDFWYRPASIAVRYLTYGCSDMAFARDGPYWRQMRKLCVTKLFSRRRAETWLAVRDGYGELARAVGRSSGEAVNLGELIFKHTVSIIFRAAFGVRDVQGLDEFIPMFKEFSKLLEAFHVGDFFPWLSWMGRRGFDRRLRTVRGALGTFVDKIIDEHVRRGKNPDDADADMVDGLLALLADANQASGEDDLRFTRDNVRAMMMDMLFGGPDTVGFTIEWAMAEMMHCPDILLRLQQELVDIVGLDRTVDESDLGKLPFLKCVIKETLRMHPPIPIHLHGNTKDCVLGGYSVPRGSRVF…
> TraesCS7B02G254200	>TaF5H4-B
	MAAFAKIAMECLHDPLIWLLLASVALVILQRRRLNPPPLPPGPKPLPIIGNMMMADQLTHRGLAALAKQYGGLLHLRLGSLRVFAVSTPEYAREVLQAQDSDFWYRPASIVIRYLTYGCSDMAFAHDGPYWRQMRKLCVTKLFSRRRAETWLAVRDGYGELARAVGRSSGEAVNLGELIFKHTVSIIFRAAFGVRDVQGLDEFIPMFKEFSKFLEAFHVGDFFPWLSWMGRRGFDRGLRTVRGALGTFVDKIIDEHVRRGKNPDDADADMVDGLLALLADANQASGEDDLRFTRDNVRAMMMDMLFGGPDTVGFTIEWAMAEMIHCPDILLRLQQELVDNVGLDRIVDELDLGKLPFLKCVIKEMLQMHPPIPIHLHGNTKDCVLGGYSVPSGSRVFIN…
> TraesCS7A02G373000	>TaF5H4-A
	MAAFAKIAMECVHDPLIWLLIASVALVILRRRRLNPPLPPGPKPLPIIGNMMMADQLTHRGLAALAKQYGGLLHLRLGSLRVFAVSTPEYAREVLQAQDGDFWHRPASIAVRYLTYGCSDMAFARDGPYWRQMRKLCVTRLFSRRRAETWLAVRDGYGELARAVGRSGGEAVNLGELIFKHTVSVIFRAAFGVRDVQGLDEFIPMFKEFSKLLEAFHVGDFFPWLSWMGRRGFDRRLRTVRAALGTFVDKIIDEHVRRGKNPDDADADMVDGLLALLADANQASGEDDLRFTRDNVRAMMMDMLFGGPDTVGFTIEWAMAEMIHCPHILLRLQQELADVVGLDRIVTESDLGKLPFLKCVVKETLRLHPPIPIHLHGTTKDCVLGGYSVPRGSRVFINA…
>Misin01G179200	>MsF5H1
	MAAVAKIAVEWLQDPLSCVFLVTLAVVLLQLRRRGKAPLPPGPKPLPIVGNMAMMDQLTHRGLAALAEKYGGLLHLRLGRLHAFAVSTPEYAREVLQTQDGVFSNRPATIAIAYLTYDRADMAFAHYGPFWRQMRKLCVMKLFSRRRAETWVAVRDECAALVRGVASSSGGGEKAVNLGELIFNLTKNVTFRAAFGTRDGEDQEEFIAILQEFSKLFGAFNIGDFLPWLGWMDLQGINRRLRAARSALDRFIDKIIDEHVRRGKSPDDADADMVDDMLAFFAEAKPAAVNGGKGGAAANGDDLQSTLRLTRDNIKAIIMDVMFGGTETVASAIEWAMAEMMHSPDDLCRLQQELADVVGLNRNVNESDLDKLPFLKCVIKETLRLHPPIPLLLHETADD…
>Misin02G177100 (Miscanthus)	>MsF5H2
	MAAVAKIALEWLQDPLSCVFLVTLAVVLLQLRRRGKAPLPPGPKPLPIVGNMAMMDQLTHRGLAALAEKYGGLLHLRMGRLHAFAVSTPEYAREVLQTQDGVFSNRPATIAIAYLTYDRADMAFAHYGPFWRQMRKLCVMKLFSRRRAETWVAVRDECAALVRAVASSSVGAGGEAVAVNLGELIFNLTKNVTFRAAFGTRDGEDQEEFIAILQEFSKLFGAFNIGDFLPWLGWMDLQGINRRLRAARSALDRFIDKIIDEHVRRGKSPDDADADMVDDMLAFFAEAKPATVNGGGGGKGGAAAANGGDDLQSTLRLTRDNIKAIIMDVMFGGTETVASAIEWAMAEMMHSPDDLRRVQQELADVVGLDRNVNESDLDKLPFLKCVIKETLRLHPPIPL…
>Misin10G068700 (Miscanthus)	>MsF5H3
	MAGMATIAMEWPNDLLSWVFLASLAVVLLQLRQRSKLPLPPGPQPLPIIGNMMMMGQLTHRGMAALAERYGGLLHLRLGRRHVFVVSTAEYAREVLQAQDVAFANRPATTAIAYLSYGNADMAFAHYGPFWRQARKLSVTKLFSRRRAETWLAVRGESEALLRALAQRSGEAVNLGDLVFSLSTNVIYRAAFGTRGCEGLGEYTSFLKEFSQNISAFNIGDFMPWLAWIDPKRRLRETRDGLDRFIDKIIDDHIQRGRSSTDAQADIVDEMLACIPGDAVDDRHGSLRLTRGNIKAIILDLMFGGTETVASSIEWAMKELLRNPDDLRRLQQELADVVGMDRNVTESDLSELPFLTCVVKETLRMHPPIPMLYHATAKDCVVGGYSVPRGSQVTVNVWA…
Pavir.Ia01427 (Switchgrass)	>PvF5H1
	MVAVPKVAMEWLQDPLSWVLLASLALFLLQLRRWGKAPLPPGPKPLPIIGNMTMMDQLTHRGLAALAEQYGGLLHLRLGQLHVFAVSTPEFAREVLQAQDAAFSNRPATIAVSYLTYDRADMAFAHYGPFWRQMRKLCVMKLFSRRRAETWVAVRDESAALVRAVASSAGEAVNLGDLIFNLTMNVTFRAAFGTRDGEDQEEFIAILQEFSKLFGAFNVGDFIPWLSWMDPQGINRRTRDARAALDRFIDRIIDEHIRRGKNPDDADADMVDDMLAYLAEAKPNKDGGKSAAGDVDDLQNTLRLTRDNIKAIIMDVMFGGTETVASAIEWAMAEMMHRPDELRRLQQELADVVGYDRNVNESDLDKLPFLRCVVKETLRLHPPIPVLLHETAEDCVVGG…
>Pavir.Ib03743(Switchgrass)	>PvF5H2
	MVAVPKIAMEWLQDPLSWVLLASLAFVLLQLRRRGKAPLPPGPKPLPIIGNMMIMDQLTHRGLAALADLYGGLLHLRLGQLHAFAVSTPEYAREVLQAQDGAFSNRPATITVSYLTYDRADMAFANYGPFWRQIRKLSVMKLFSRRRAETWAAVRDELAALVRAVASAGAGEAVNLGELIFNLTKNVTFRAAFGTRDGEDQEEFIAILQEFSKLFGTFKIGDFIPWLRWVDPQGVNRRARAARAALDRFIDKIIDEHIRRGRSPDDAGADMVDDMLAFLAEAKPNKDGGGRSAAGDVDDLQSTLRLTRDNIKAIIMDVMFGGTETVASAIEWAMAEMMHSPDDLRRLQQELADVVGFDRNASESDLDRLPFLRCVVKETLRLHPPIPVLLHETAEDCVV…
>Sevir.9G193800 (Setaria viridis)	>SvF5H1
	MAVAVPKIAMEWLQDPLSWALLALVAFVLLQLRRRGKGPLPPGPKPLPIIGNMTMMDQLTHRGLAALAEQYGGLLHLRLGRLHAFAVSTPEYAREVLQVQDGAFSNRPATIAIAYLTYDRADMAFAHYGPFWRQMRKLCVMKLFSRRRAETWVAVRDEAAALVRAVASSGGEAVNLGELIFNLTKNVIFRAAFGTRDGGGQDEFIAILQEFSKLFGAFNIGDFIPWLSWMDPQGINRRLRAARAALDRFIDKIIDEHMKRGKSPDDADADMVDDMLAFLAEAKPANKSAAGGDVDDLQSTLRLTRDNIKAIIMDVMFGGTETVASAIEWAMAEMMHSPDDLRRLQQELADVVGYDRNVSESDLDKLPFLRCVIKETLRLHPPIPLLLHETAEDCVVGGY…
>TraesCS2D02G386000.1	>TaF5H5_2DL
	MEAWWPQCGVHLALLLTGLILYRAISSRRYGLRPLPLPPGPRVLPFVGNIFYTRDMTHRGLARLSARYGGLLHLRVGRLSTVVVSTPEMARLVLQVNDRAFANRPASAPIAYLTYGRADMVFAQYGPFWREMRKLCVHKLFSHRRAASWAAVHDEVDDLIRDVARYTGSVVNLGELLFNMSMNITLRAALGMRNEGEDAAEFVAIVQEFAELFVVSNSTLADYVPWVARLDLQGINRRMVAARGALDRFIDRAIDEHLAHPKPVDAAGADMVDGMLAFLVDMPVSADRVSTDSSAHGSTLRLTRDNIKATIMDVMIGGTGPVAMIIEWLMSELLRDPEEMKRVQSELAVVVGLHRQVAAGDLDELPYLRCAVKETLRVHPPGPLLQHEAAEDCDVAGCR…
>TraesCS2A02G388200.1	>TaF5H5_2AL
	METWWPQCGLHLALLLTALILYRAISSRRYGLRPLPLPPGPRVLPFVGNIFYTRDMTHRGLARLSARYGGLLHLRVGRLSTVVVSTPEMARLVLQVNDRAFANRPASAPIAYLTYGRADMVFAQYGPFWREMRKLCVHKLFSHRRAKSWAAVHDEVNDLIRHVARYTGSVVNLGELVFNMSMNITLRAALGMRNEGEDAAEFVAIVQEFAELFAVSNSTLADYVPWVARLDLHGINRRMVAARAALDRFIDRAIDEHLAHPKPVDAADADMVDGMLAFLVDMPGSADRVSTDSSAHGHGSTLRLTRDNIKATIMDVMIGGTGPVAMIIEWLMSELLRDPEEMKRVQNELAVVVGLHRQVAAGDLGELPYLRCAVKETLRVHPPGPLLQHEAAEDCDVAG…
>TraesCS2B02G406200.1	>TaF5H5_2BL
	MEAWWPQCGVHLALLLTGLILYRAISSRRYGLRPLPLPPGPRVLPFVGNIFYTRDMTHQGLARLSARYGGLLHLRVGRLSTVVVSTPEMARLVLQVNDRAFANRPASAPIAYLTYGRADMVFAQYGPFWREMRKLCVHKLFSHRRAASWAAVHDEVDDLIRDVARYTGSVVNLGELVFNMSMNITLRAALGMRNEGEDAAEFVAIVQEFAELFVVSNSTLADYVPWVARLDLQGINRRMVAARGALDRFIDRAIDEHLAHPKPVDAADADMVDGMLAFLVDMPGSADRVSTDSSAHGSTLRLTRDNIKATIMDVMIGGTGPVAMIIEWLMSELLRDPEEMKRVQNELAVVVGLHRQVAAGDLDELPYLRCAVKETLRVHPPGPLLQHEAAEDCDVAGCR…
>LOC_Os06g24180	>OsF5HL
	MGMGTPSGPSPIFLGKLLWPGEVTITLRWIGHRVKNGWKFRVTAYGPFKHEYYSQDAYFVTASLISIAFFLWYASRLRRTAILLPPGPPGLPVLGNLLSVHQFTHRGLAKLSKIHGGFFHLRVGQPNVFVVSSPETVREIIHENDSVFSHCPVTAAMVYVSYDLADMAFAHYGPFWRQMRKLCVLKLFSPRRDVSWRVVRGEVDALVRSVAELRRVAGSVGDLVFKFATNVTFRAAFGAQSREDEKVFVDIILELSEIFMAFNMGDYIPCLGWLDLNGIGKRMAAARHALDVFIDRIIDEHLAKLRNGDVSASDMVDDMIAYLVDAPGGRHKRADGVELGDLHLTRDNIKGLIMARNDIMFGGTKTVASTVEWALSELLRNPDELKRAQDELAGVVGLR…
>Misin04G042100	>MsF5H4
	MHVCTGNIPNTTTSFLASKSMQEQVQRLSTFVFSMACSHAQVYYYLLLIGIAAAFVAVMSFFLGYSGRRLRCRGRGFPPGPPGLPVIGNLLAMDQFTHRGLAKLAKVHGGFFHLPIGFANVFVVSSPETAREILQEQASVFSHRPVTAAMAYVSYDLADMAFARYGPFWRQMRKLCVVKLFSRGRDQSWRTVRAEVDGLVRSLAEQEEGAVASVGELAFKFATNTTLRAAFGARSQDDEAEFVAIIRELSQTFLAFNVADFIPFVGFLDLNGIIRRTRGARHALDVFIDRIIDEHVARWGNGDVSAADMVDDMIAYLAETPGRDMREDGVEPKDLRPTRENIKGLIMDIMFGGTETIAATLEWGMVELLRSPGELERAQDELARVVGLHRKVDESDVDK…
>TraesCS3A02G037800.1	>TaF5H2_3A
	MTLVNQLTHRGLVALAEKYGGLLHLRLGCLHVVAVSTPEHAREVLQARDGAFSNRPATAANVYLTYGRSDLAFADGGAHVREMRRLCATTLFSRRRAETWLAVRDGYGALARDVGRRSGQAVNLGELIFNHTVGVIFRAAFSAGDEGLDEFVVILRVFSKILGEFHAGDYFPWLRWTARLGFNRRLHAARSAVDKFTDKIIDDHVRIGKNPADADADLVDGLLAFLADANLSKGKDALHFTRDNVKAMIMDMLFGGPETVSSTIEWAMAEIMRSPNTFARLQQELADVVGLDRMVDDSDLDKLPFLGCIVKETFRMHPPIPTLLHAAAKDCVLGGYSVPKGSRIIINMWAINRYREAWKDGDAFRPTRFMPGEGDAVGQDLKGGSFEFLPFGSGRRSCP…

## Sheet: S2_Metablomics
m/z traces with an increased abundance in hvF5H RNAi lines
number	HvF5H1-RNAi/Control Ratio	Unique Identifier	retention time (min)	experimental m/z	theoretical m/z	m/z difference (ppm)	Name	structure (smiles notation)
1	7.5023	1.30_442.9855m/z	1.3	442.986
2	8.44619	1.37_381.0963m/z	1.37	381.096
3	5.391	1.76_339.0669m/z	1.76	339.067
4	43.8554	4.04_146.0350m/z	4.04	146.035
5	67.4435	4.04_207.0654m/z	4.04	207.065
6	31.1641	4.04_251.0554m/z	4.04	251.055
7	9.15733	4.91_429.1391m/z	4.91	429.139
8	8.95432	5.53_317.1037m/z	5.53	317.104
9	5.47056	5.57_777.1890m/z	5.57	777.189
10	85.484	6.05_537.1969m/z	6.05	537.197
11	8.28238	6.13_281.0670m/z	6.13	281.067
12	7.13626	6.18_425.1327m/z	6.18	425.133
13	6.89537	6.18_545.1265m/z	6.18	545.126
14	13.8592	6.65_495.1505m/z	6.65	495.151
15	70.934	7.23_561.1348m/z	7.23	561.135
16	40.7481	7.24_507.1502m/z	7.24	507.15
17	129.595	7.26_625.2112m/z	7.26	625.211
18	14.2509	7.36_405.0873m/z	7.36	405.087
19	14.338	7.54_713.2292m/z	7.54	713.229
20	113.859	7.60_507.1501m/z	7.6	507.15
21	68.625	7.96_713.2294m/z	7.96	713.229
22	7.84716	8.75_317.1033m/z	8.75	317.103
23	18.1093	8.81_327.1241m/z	8.81	327.124
24	32.7797	8.82_375.1441m/z	8.82	375.144
25	24.7473	8.83_195.0644m/z	8.83	195.064
26	10.6751	8.93_571.1576m/z	8.93	571.158
27	78.002	8.94_1055.3781m/z	8.94	1055.38
28	20.7515	8.96_339.1233m/z	8.96	339.123
29	41.5563	9.08_723.2503m/z	9.08	723.25
30	26.3809	9.08_767.2391m/z	9.08	767.239
31	29.9252	9.10_327.1235m/z	9.1	327.123			G(8-O-4)G [in-source fragment, -H2O -CH2O]
32	26.5297	9.11_165.0532m/z	9.11	165.053			G(8-O-4)G [in-source fragment, A- -CH2O]
33	10.8359	9.11_179.0680m/z	9.11	179.068			G(8-O-4)G [in-source fragment, B-]
34	16.6539	9.11_195.0644m/z	9.11	195.064			G(8-O-4)G [in-source fragment, A-]
35	38.407	9.11_375.1457m/z	9.11	375.146	375.145	-2.1325	G(8-O-4)G	OC1=C(OC)C=C(C(O)C(OC2=C(OC)C=C(/C=C/CO)C=C2)CO)C=C1
36	84.157	9.12_551.1760m/z	9.12	551.176
37	17.0189	9.39_373.1294m/z	9.39	373.129	373.129	-0.268004	G(red8-5)ferulic acid + hexose [in-source fragment, - dehydrated hexose]	OC1=C(OC)C=C(CC(C2=CC(/C=C/C(OC3OC(CO)C(O)C(O)C3O)=O)=CC(OC)=C2O)CO)C=C1
38	27.1562	9.40_1073.7962m/z	9.4	1073.8
39	17.3382	9.51_353.1035m/z	9.51	353.103
40	42.6623	9.75_571.2176m/z	9.75	571.218	571.218	1.57558	G(8-O-4)G(8-O-4)G 1	OC1=C(OC)C=C(C(O)C(OC2=C(OC)C=C(C(O)C(OC3=C(OC)C=C(/C=C/CO)C=C3)CO)C=C2)CO)C=C1
41	86.502	9.93_571.2184m/z	9.93	571.218	571.218	0.175064	G(8-O-4)G(8-O-4)G 2	OC1=C(OC)C=C(C(O)C(OC2=C(OC)C=C(C(O)C(OC3=C(OC)C=C(/C=C/CO)C=C3)CO)C=C2)CO)C=C1
42	75.6486	10.50_565.1644m/z	10.5	565.164
43	60.6791	10.55_489.1755m/z	10.55	489.175
44	89.5462	10.55_555.1627m/z	10.55	555.163
45	45.0404	10.56_339.1233m/z	10.56	339.123
46	123.126	10.77_731.2537m/z	10.77	731.254
47	58.1372	11.09_301.1087m/z	11.09	301.109
48	53.9067	11.10_533.1674m/z	11.1	533.167
49	42.8609	11.25_355.1185m/z	11.25	355.118
50	35.5292	11.55_533.1640m/z	11.55	533.164
51	10.8426	11.63_373.1293m/z	11.63	373.129	373.129	0	Gox(8-O-4)G	OC1=C(OC)C=C(C(C(OC2=C(OC)C=C(/C=C/CO)C=C2)CO)=O)C=C1
52	43.1941	12.35_531.1860m/z	12.35	531.186
53	9.73186	12.47_329.1377m/z	12.47	329.138
54	31.4487	12.76_555.2114m/z	12.76	555.211	555.224	21.9736	G(8-O-4)G(red8-5)G 1	OC1=C(OC)C=C(C(O)C(OC2=C(OC)C=C(CC(C3=CC(/C=C/CO)=CC(OC)=C3O)CO)C=C2)CO)C=C1
55	17.5088	12.94_327.1247m/z	12.94	327.125	327.124	-2.75124	G(8-5)G [in-source fragment, -CH2O]	OC1=C(OC)C=C(C2C(C3=CC(/C=C/CO)=CC(OC)=C3O2)CO)C=C1
56	14.3425	12.94_339.1251m/z	12.94	339.125	339.134	27.4235	G(8-5)G [in-source fragment, -H2O]	OC1=C(OC)C=C(C2C(C3=CC(/C=C/CO)=CC(OC)=C3O2)CO)C=C1
57	50.9153	13.09_555.2150m/z	13.09	555.215	555.224	15.4895	G(8-O-4)G(red8-5)G 2	OC1=C(OC)C=C(C(O)C(OC2=C(OC)C=C(CC(C3=CC(/C=C/CO)=CC(OC)=C3O)CO)C=C2)CO)C=C1
58	27.2776	13.10_713.2516m/z	13.1	713.252
59	72.4428	13.11_553.2090m/z	13.11	553.209	553.208	-1.9884	G(8-O-4)G(8-5)G 1	OC1=C(OC)C=C(C(O)C(OC2=C(OC)C=C(C3C(C4=CC(/C=C/CO)=CC(OC)=C4O3)CO)C=C2)CO)C=C1
60	81.7503	13.29_569.2014m/z	13.29	569.201	569.203	2.45959	G(red8-8)ferulic acidG(4-O-8)G 1	OCC(OC1=CC=C(CC2C(OC(C2CO)C3=CC(OC)=C(O)C=C3)=O)C=C1OC)C(O)C4=CC=C(O)C(OC)=C4
61	101.878	13.36_785.2660m/z	13.36	785.266
62	68.0355	13.41_553.2072m/z	13.41	553.207	553.208	1.26535	G(8-O-4)G(8-5)G 2	OC1=C(OC)C=C(C(O)C(OC2=C(OC)C=C(C3C(C4=CC(/C=C/CO)=CC(OC)=C4O3)CO)C=C2)CO)C=C1
63	13.0437	13.55_327.1236m/z	13.55	327.124
64	123.819	13.64_569.2011m/z	13.64	569.201	569.203	2.98664	G(red8-8)ferulic acidG(4-O-8)G 2	OCC(OC1=CC=C(CC2C(OC(C2CO)C3=CC(OC)=C(O)C=C3)=O)C=C1OC)C(O)C4=CC=C(O)C(OC)=C4
65	28.669	13.72_327.1235m/z	13.72	327.123
66	11.9535	13.72_585.2140m/z	13.72	585.214
67	13.1189	13.79_353.1034m/z	13.79	353.103
68	28.8216	13.95_881.2707m/z	13.95	881.271
69	153.741	14.25_1051.3457m/z	14.25	1051.35
70	13.1889	14.27_685.2125m/z	14.27	685.212
71	57.3876	14.79_881.2725m/z	14.79	881.273
72	16.4377	14.95_881.2721m/z	14.95	881.272
73	4.0197	15.11_703.2027m/z	15.11	703.203
74	21.2109	15.40_337.1074m/z	15.4	337.107	337.108	2.37313	G(8-5)G' [-H2O]	OC1=C(OC)C=C(C2C(C3=CC(/C=C/C=O)=CC(OC)=C3O2)CO)C=C1
75	48.2659	15.41_551.1905m/z	15.41	551.191
76	535.44	15.72_763.2595m/z	15.72	763.26	763.261	1.5722	G(8-8)ferulic acid(8-O-4)G(8-O-4)G 1	OC1=CC=C(C2C3COC(C3C(O2)=O)C4=CC(OC)=C(OC(CO)C(O)C5=CC(OC)=C(OC(CO)C(O)C6=CC(OC)=C(O)C=C6)C=C5)C=C4)C=C1OC
77	134.454	15.78_523.1905m/z	15.78	523.191
78	153.142	15.90_763.2610m/z	15.9	763.261	763.261	-0.39305	G(8-8)ferulic acid(8-O-4)G(8-O-4)G 1	OC1=CC=C(C2C3COC(C3C(O2)=O)C4=CC(OC)=C(OC(CO)C(O)C5=CC(OC)=C(OC(CO)C(O)C6=CC(OC)=C(O)C=C6)C=C5)C=C4)C=C1OC
79	76.4393	16.74_517.1853m/z	16.74	517.185
80	98.301	17.19_567.2011m/z	17.19	567.201
81	58.2488	17.45_917.2867m/z	17.45	917.287	917.287	0.76312	tricin(4-O-8)G(4-O-8)G(4-O-8)G	O=C1C=C(C2=CC(OC)=C(OC(CO)C(O)C3=CC(OC)=C(OC(CO)C(O)C4=CC(OC)=C(OC(CO)C(O)C5=CC(OC)=C(O)C=C5)C=C4)C=C3)C(OC)=C2)OC6=C1C(O)=CC(O)=C6
82	130.823	17.63_863.2606m/z	17.63	863.261
83	77.602	17.63_909.2673m/z	17.63	909.267
84	31.0071	17.72_895.2885m/z	17.72	895.288
85	23.5545	18.31_747.2637m/z	18.31	747.264
86	15.1914	18.32_729.2540m/z	18.32	729.254
87	19.8554	18.62_909.2678m/z	18.62	909.268
88	70.5103	18.66_895.2860m/z	18.66	895.286
89	5.49355	18.89_747.2653m/z	18.89	747.265	747.266	0.669106	G(8-O-4)p-coumaroyl S(8-O-4)G	OC1=C(OC)C=C(C(O)C(OC2=C(OC)C=C(C(OC3=C(OC)C=C(/C=C/CO)C=C3)C(O)COC(/C=C/C4=CC=C(O)C=C4)=O)C=C2OC)CO)C=C1
90	60.9521	18.96_729.2548m/z	18.96	729.255
91	430.13	19.43_581.2005m/z	19.43	581.201	581.203	3.95733	G(8-8)ferulic acid(4-O-8-7OMe)G 1	OC1=C(OC)C=C(C2C3COC(C3C(O2)=O)C4=CC(OC)=C(OC(CO)C(OC)C5=CC=C(O)C(OC)=C5)C=C4)C=C1
92	241.103	19.62_581.2019m/z	19.62	581.202	581.203	1.54852	G(8-8)ferulic acid(4-O-8-7OMe)G 2	OC1=C(OC)C=C(C2C3COC(C3C(O2)=O)C4=CC(OC)=C(OC(CO)C(OC)C5=CC=C(O)C(OC)=C5)C=C4)C=C1
93	9.46143	19.99_703.2011m/z	19.99	703.201	703.203	2.98634	tricin(4'-O-8)G(8-5)G	OC1=C(C(C=C(C2=CC(OC)=C(OC(CO)C(O)C3=CC(OC)=C4C(C(CO)C(O4)C5=CC=C(O)C(OC)=C5)=C3)C(OC)=C2)O6)=O)C6=CC(O)=C1
94	54.8169	20.14_745.2489m/z	20.14	745.249
95	8.99277	20.27_735.2286m/z	20.27	735.229	735.229	1.0881	tricin(4-O-8)G(4-O-8-7OMe)G	OC1=C(C(C=C(C2=CC(OC)=C(OC(CO)C(O)C3=CC=C(OC(CO)C(OC)C4=CC=C(O)C(OC)=C4)C(OC)=C3)C(OC)=C2)O5)=O)C5=CC(O)=C1
m/z traces with decreased abundance in hvF5H RNAi lines
number	HvF5H1-RNAi/Control Ratio	Unique Identifier	retention time (min)	experimental m/z	theoretical m/z	m/z difference (ppm)	Name	structure (smiles notation)
96	14.2401	1.94_367.0838m/z	1.94	367.084
97	9.5114	1.94_153.0174m/z	1.94	153.017
98	4.29442	1.94_169.0494m/z	1.94	169.049
99	13.1847	1.97_197.0444m/z	1.97	197.044
100	10.2642	2.00_439.0612m/z	2	439.061
101	17.0451	2.25_169.0490m/z	2.25	169.049
102	3.7558	2.25_332.1113n	2.25	331.104
103	3.46349	2.25_161.0442m/z	2.25	161.044
104	76.0007	2.27_401.1094m/z	2.27	401.109
105	57.83	2.40_522.9666m/z	2.4	522.967
106	13.8913	2.66_360.1071n	2.66	359.1	359.098	-3.89864	syringic acid 4-O-hexoside	OC(C1=CC(OC)=C(OC2C(O)C(O)C(O)C(CO)O2)C(OC)=C1)=O
107	12.2409	2.67_197.0446m/z	2.67	197.045			syringic acid 4-O-hexoside [in-source fragment, -dehydrated hexose]
108	4.46061	3.37_373.1136m/z	3.37	373.114
109	3.25708	3.43_360.1091n	3.43	359.102	359.098	-9.74654	syringoyl hexose	OC1=C(OC)C=C(C(OC2C(O)C(O)C(O)C(CO)O2)=O)C=C1OC
110	91.0768	3.62_381.0827m/z	3.62	381.083
111	26.0227	3.87_418.1106n	3.87	835.224
112	22.6593	4.16_493.1537m/z	4.16	493.154
113	36.3336	4.44_321.0637m/z	4.44	321.064
114	19.2106	4.45_299.0776m/z	4.45	299.078
115	6.30818	4.58_195.0648m/z	4.58	195.065
116	6.1705	5.57_435.1662m/z	5.57	435.166
117	4.71608	5.57_405.1552m/z	5.57	405.155
118	8.688	5.78_241.0538m/z	5.78	241.054
119	7.01556	6.64_119.1635m/z	6.64	119.163
120	7.10703	6.65_163.1722m/z	6.65	163.172
121	48.2643	6.84_585.1842m/z	6.84	585.184
122	93.4087	7.10_585.1824m/z	7.1	585.182
123	76.9559	7.19_209.0802m/z	7.19	209.08
124	5.80155	7.34_209.0806m/z	7.34	209.081	209.082	6.2177	sinapyl alcohol	OC1=C(OC)C=C(/C=C/CO)C=C1OC
125	85.6346	7.55_498.1548m/z	7.55	498.155
126	14.5608	7.55_306.0766m/z	7.55	306.077
127	16.9965	7.63_119.0484m/z	7.63	119.048
128	58.0426	7.71_540.1503n	7.71	539.143	539.141	-4.45151	syringoyl syringic acid 4-O-hexoside	O=C(C1=CC(OC)=C(OC2OC(CO)C(OC(C3=CC(OC)=C(O)C(OC)=C3)=O)C(O)C2O)C(OC)=C1)O
129	57.4086	7.79_514.1494m/z	7.79	514.149
130	53.2083	7.80_272.0888m/z	7.8	272.089
131	14.7233	7.80_499.1632n	7.8	498.156
132	4.60988	7.80_306.0764m/z	7.8	306.076
133	84.3826	7.83_509.1307m/z	7.83	509.131
134	230.606	7.86_223.0428m/z	7.86	223.043
135	31.3165	7.87_305.0164m/z	7.87	305.016
136	10.8061	7.88_632.2102m/z	7.88	632.21
137	26.2674	8.18_509.1665m/z	8.18	509.166
138	30.3147	8.58_724.2382m/z	8.58	724.238
139	25.2003	9.11_611.1959m/z	9.11	611.196
140	4.80213	9.32_566.2009n	9.32	565.194	565.193	-1.59237	S(red8-5)ferulic acid + hexose	OC1=C(OC)C=C(CC(C2=CC(/C=C/C(OC3OC(CO)C(O)C(O)C3O)=O)=CC(OC)=C2O)CO)C=C1OC
141	200.86	9.37_495.1142m/z	9.37	495.114
142	23.0276	9.44_757.2558m/z	9.44	757.256
143	25.6309	9.98_666.1846m/z	9.98	666.185
144	12.7175	10.88_389.1248m/z	10.88	389.125
145	23.0049	11.48_507.1501m/z	11.48	507.15
146	240.107	12.18_433.1504m/z	12.18	433.15
147	150.696	12.53_433.1504m/z	12.53	433.15	433.15	0	Sox(8-O-4)S	OCC(OC1=C(OC)C=C(/C=C/CO)C=C1OC)C(C2=CC(OC)=C(O)C(OC)=C2)=O
148	125.833	13.15_916.2825m/z	13.15	916.283
149	14.5689	14.21_629.1649m/z	14.21	629.165
150	331.113	14.48_659.2330m/z	14.48	659.233	659.235	2.27537	Sox(8-O-4)S(8-O-4)S	OCC(OC1=C(OC)C=C(C(O)C(OC2=C(OC)C=C(/C=C/CO)C=C2OC)CO)C=C1OC)C(C3=CC(OC)=C(O)C(OC)=C3)=O
151	27.2015	14.58_401.1243m/z	14.58	401.124	401.124	-0.249299	S(8-8)ferulic acid 1	OC1=C(OC)C=C(C2C3COC(C3C(O2)=O)C4=CC(OC)=C(O)C=C4)C=C1OC
152	152.072	14.59_357.1347m/z	14.59	357.135	357.134	-0.840019	S(8-8)ferulic acid 1 [in-source fragment -CO2]	OC1=C(OC)C=C(C2C3COC(C3C(O2)=O)C4=CC(OC)=C(O)C=C4)C=C1OC
153	275.954	15.43_357.1344m/z	15.43	357.134	357.134	0	S(8-8)ferulic acid 2 [in-source fragment -CO2]	OC1=C(OC)C=C(C2C3COC(C3C(O2)=O)C4=CC(OC)=C(O)C=C4)C=C1OC
154	146.688	16.05_627.2075m/z	16.05	627.207	627.208	1.27549	S(8-8)ferulic acid(4-O-8)S 1	OC1=C(OC)C=C(C2C3COC(C3C(O2)=O)C4=CC(OC)=C(OC(CO)C(O)C5=CC(OC)=C(O)C(OC)=C5)C=C4)C=C1OC
155	164.468	16.15_611.2120m/z	16.15	611.212	611.213	2.29053	Sox(8-O-4)S(8-5)G	OCC(OC1=C(OC)C=C(C2C(C3=CC(/C=C/CO)=CC(OC)=C3O2)CO)C=C1OC)C(C4=CC(OC)=C(O)C(OC)=C4)=O
156	289.056	16.41_643.2407m/z	16.41	643.241	643.24	-1.71009	S(8-O-4)S(8-8)S	OCC(OC1=C(OC)C=C(C2C3COC(C3CO2)C4=CC(OC)=C(O)C(OC)=C4)C=C1OC)C(O)C5=CC(OC)=C(O)C(OC)=C5
157	146.688	16.63_627.2070m/z	16.63	627.207	627.208	2.07268	S(8-8)ferulic acid(4-O-8)S 2	OC1=C(OC)C=C(C2C3COC(C3C(O2)=O)C4=CC(OC)=C(OC(CO)C(O)C5=CC(OC)=C(O)C(OC)=C5)C=C4)C=C1OC
158	81.0349	16.67_613.2276m/z	16.67	613.228	613.229	2.44607	G(8-O-4)S(8-8)S	OCC(OC1=C(OC)C=C(C2C3COC(C3CO2)C4=CC(OC)=C(O)C(OC)=C4)C=C1OC)C(O)C5=CC=C(O)C(OC)=C5
159	146.688	16.79_627.2064m/z	16.79	627.206	627.208	3.02931	S(8-8)ferulic acid(4-O-8)S 3	OC1=C(OC)C=C(C2C3COC(C3C(O2)=O)C4=CC(OC)=C(OC(CO)C(O)C5=CC(OC)=C(O)C(OC)=C5)C=C4)C=C1OC
160	19.9618	16.82_581.2021m/z	16.82	581.202	581.203	1.2044	S(8-O-4)p-coumaroyl S	OCC(OC1=C(OC)C=C(/C=C/COC(/C=C/C2=CC=C(O)C=C2)=O)C=C1OC)C(O)C3=CC(OC)=C(O)C(OC)=C3
161	45.4814	16.85_751.2235m/z	16.85	751.223	751.224	1.19805	G(8-O-4)S(8-O-4')tricin 1	OC1=C(C(C=C(C2=CC(OC)=C(OC(CO)C(O)C3=CC(OC)=C(OC(CO)C(O)C4=CC=C(O)C(OC)=C4)C(OC)=C3)C(OC)=C2)O5)=O)C5=CC(O)=C1
162	140.052	17.28_823.2817m/z	17.28	823.282	823.282	0.24293	S(8-8)ferulic acid(4-O-8)S(4-O-8)G 1	OC1=C(OC)C=C(C2C3COC(C3C(O2)=O)C4=CC(OC)=C(OC(CO)C(O)C5=CC(OC)=C(OC(CO)C(O)C6=CC(OC)=C(O)C=C6)C(OC)=C5)C=C4)C=C1OC
163	48.8179	17.47_751.2238m/z	17.47	751.224	751.224	0.798697	G(8-O-4)S(8-O-4')tricin 1	OC1=C(C(C=C(C2=CC(OC)=C(OC(CO)C(O)C3=CC(OC)=C(OC(CO)C(O)C4=CC=C(O)C(OC)=C4)C(OC)=C3)C(OC)=C2)O5)=O)C5=CC(O)=C1
164	208.976	17.57_823.2818m/z	17.57	823.282	823.282	0.121465	S(8-8)ferulic acid(4-O-8)S(4-O-8)G 2	OC1=C(OC)C=C(C2C3COC(C3C(O2)=O)C4=CC(OC)=C(OC(CO)C(O)C5=CC(OC)=C(OC(CO)C(O)C6=CC(OC)=C(O)C=C6)C(OC)=C5)C=C4)C=C1OC
165	201.11	17.60_555.1502m/z	17.6	555.15
166	8.45754	17.71_597.1965m/z	17.71	597.197	597.198	2.00939	S(8-8)ferulic acid(4-O-8)G	OC1=C(OC)C=C(C2C3COC(C3C(O2)=O)C4=CC(OC)=C(OC(CO)C(O)C5=CC=C(O)C(OC)=C5)C=C4)C=C1OC
167	494.661	17.80_625.1916m/z	17.8	625.192	625.193	1.75946	S(8-8)ferulic acid(4-O-8)Sox	[O-]C1=C(OC)C=C(C2C3COC(C3C(O2)=O)C4=CC(OC)=C(OC(CO)C(C5=CC(OC)=C(O)C(OC)=C5)=O)C=C4)C=C1OC
168	196.563	17.90_823.2821m/z	17.9	823.282	823.282	-0.24293	S(8-8)ferulic acid(4-O-8)S(4-O-8)G 3	OC1=C(OC)C=C(C2C3COC(C3C(O2)=O)C4=CC(OC)=C(OC(CO)C(O)C5=CC(OC)=C(OC(CO)C(O)C6=CC(OC)=C(O)C=C6)C(OC)=C5)C=C4)C=C1OC
169	44.6302	17.98_809.3033m/z	17.98	809.303	809.303	-0.864941	G(8-O-4)S(8-8)S(8-O-4)G 1	OCC(OC1=C(OC)C=C(C2C3COC(C3CO2)C4=CC(OC)=C(OC(CO)C(O)C5=CC=C(O)C(OC)=C5)C(OC)=C4)C=C1OC)C(O)C6=CC=C(O)C(OC)=C6
170	401.87	18.04_581.2021m/z	18.04	581.202	581.203	1.2044	S(8-O-4)p-coumaroyl S	OCC(OC1=C(OC)C=C(/C=C/COC(/C=C/C2=CC=C(O)C=C2)=O)C=C1OC)C(O)C3=CC(OC)=C(O)C(OC)=C3
171	41.0839	18.37_937.1732m/z	18.37	937.173
172	39.9175	18.69_809.3024m/z	18.69	809.302	809.303	0.247126	G(8-O-4)S(8-8)S(8-O-4)G 2	OCC(OC1=C(OC)C=C(C2C3COC(C3CO2)C4=CC(OC)=C(OC(CO)C(O)C5=CC=C(O)C(OC)=C5)C(OC)=C4)C=C1OC)C(O)C6=CC=C(O)C(OC)=C6
173	16.4734	18.93_819.2359m/z	18.93	819.236

## Sheet: S3_Transcriptomics
		Up-regulated genes
Position (b)	Gene ID	Primary accession	F5H/Control (Fold change)	Annotation
405693765	HORVU4Hr1G04983	MLOC_57302.1	22.142	DEAD/DEAH DNA/RNA helicase (MER)
740899790	HORVU2Hr1G117770	MLOC_16007.1	14.9953	Hydroxyjasmonate sulfotransferase
655791822	HORVU7Hr1G122290	MLOC_36712.1	12.4539	NBS-LRR disease resistance protein
438494084	HORVU5Hr1G056090	MLOC_70705.1	6.67333	F-box protein, cyclin like; DUF295
473593301	HORVU4Hr1G056470	AK366019	5.37166	Omega-3 fatty acid desaturase
542158679	HORVU4Hr1G064780	MLOC_63274.1	5.17558	MYB family transcription factor
488376594	HORVU6Hr1G070220	AK249071.1	4.45298	UDP-glucuronysyl/glucosyltransferase (UGT)
474082929	HORVU1Hr1G066820	MLOC_27203.1	3.74773	Plastocyanin, electron carrier activity, redox reactions
594275263	HORVU5Hr1G094150	MLOC_54042.1	3.64744	Two component system response regulator
161080458	HORVU3Hr1G031950	AK372694	3.44708	E2 ubiquitin conjugating enzyme
115321811	HORVU2Hr1G030870	MLOC_59358.4	3.25845	Sucrose synthase (SUS)
2367155	HORVU2Hr1G001150	MLOC_9912.1	3.16365	Cytochrome P450 (CYP86A)
53041186	HORVU7Hr1G028750	MLOC_3626.1	3.12818	F-box protein
568038766	HORVU5Hr1G082620	MLOC_60337.1	3.02215	Unknown function, DUF1442
		Down-regulated genes
Position (b)	Gene ID	Primary accession	F5H/Control (Fold change)	Annotation
309606197	HORVU2Hr1G052170	MLOC_68147.1	6.93985	Alpha/beta hydrolase, DUF1749
309620852	HORVU2Hr1G052170	MLOC_36535.1	6.62817	Alpha/beta hydrolase, DUF1749
667824080	HORVU2Hr1G095030	MLOC_51620.2	5.35886	Cytochrome P450 (CYP87A)
348548115	HORVU1Hr1G047220	MLOC_66597.1	4.71719	F5H1
6881503	HORVU3Hr1G002680	MLOC_64931.2	3.25604	F-box domain protein
		F5H gene expression
		Gene	Gene ID	Avg expression Controls (ln)	Avg expression F5H RNAi (ln)	RNAi/Control ratio
		F5H1	HORVU1Hr1G047220	11.34	9.79	0.21
		F5H2	HORVU3Hr1G014930	ND	ND	N/A
		F5H3	HORVU2Hr1G109440	1.94	1.93	0.99
		F5H4	HORVU7Hr1G084500	2.28	2.28	1
		F5H5	HORVU2Hr1G092360	ND	ND	N/A
